# Supplementary material for: Structural role of essential light chains in the apicomplexan glideosome
Source: PubMed Central journal article supplement (PMC7555893; doi:10.1038/s42003-020-01283-8), 2020-10-13
Supplement: 42003_2020_1283_MOESM1_ESM.pdf [file 42003_2020_1283_MOESM1_ESM.pdf]

## Supplementary Fig. 1

**a**

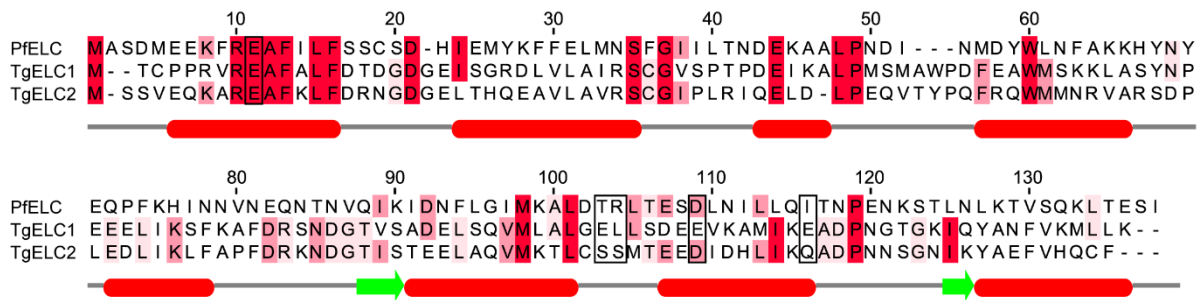

**b**

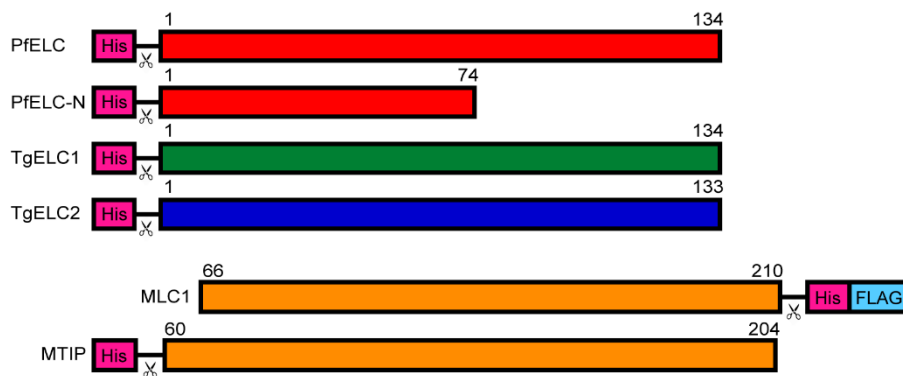

**c**

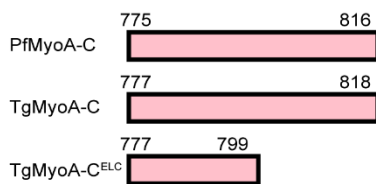

(A) Sequence alignment of *P. falciparum* PfELC and *T. gondii* TgELC1 and TgELC2. Identical residues between these proteins are highlighted in red. The boxed residues indicate the residues involved in the polar interactions with TgMyoA (see Fig. 3c-d and Supplementary Table 6). Secondary structure elements of PfELC as predicted by JPred are graphically shown under the sequence alignment. (B) Schematic representation of the myosin light chain constructs used in this study. The numbers indicate the sequence residues of the particular protein; the scissor symbol represents a TEV cleavage site. (C) The peptide constructs representing the C-terminal regions of MyoAs with indicated domain borders used in this study. The constructs PfMyoA-C and TgMyoA-C encompass both MLC1/MTIP binding sites as well as the upstream conserved region which binds the essential light chains. The construct TgMyoA-C<sup>ELC</sup> only consists of the TgELC binding site.

## Supplementary Fig. 2

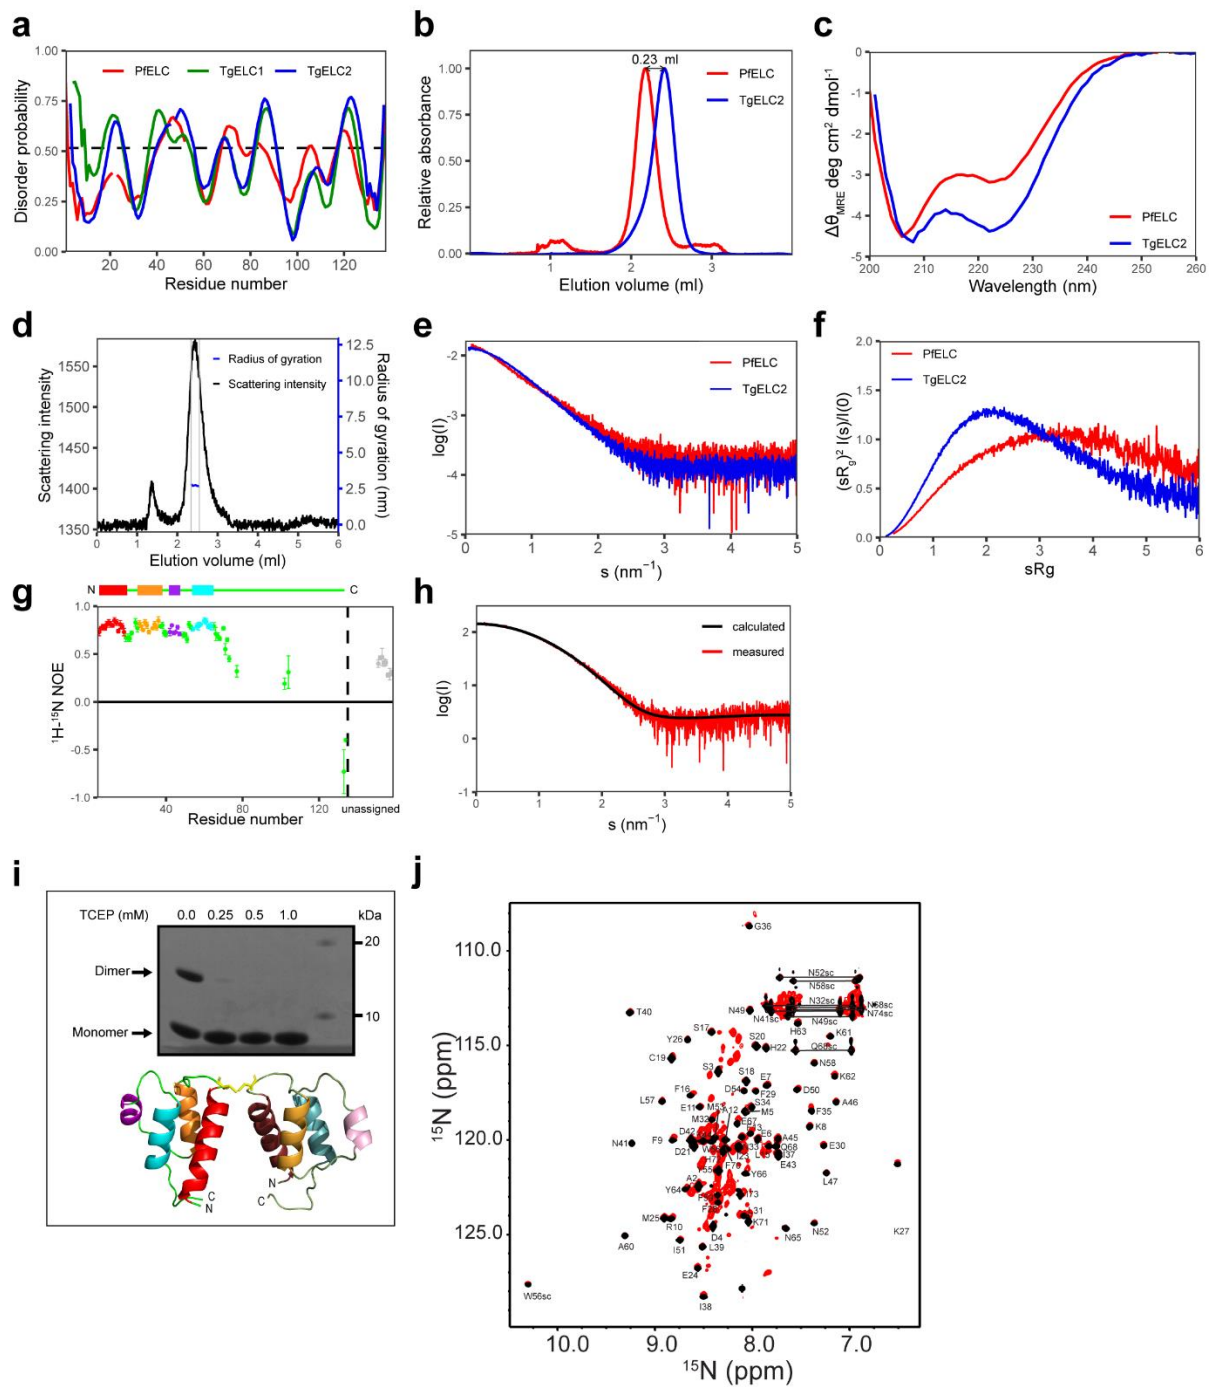

(A) Disorder probability prediction calculated by the disEMBL server shows differences between PfELC and TgELCs, predominantly in the C-terminal region of the sequence. The disorder for the prediction was defined by dictionary of secondary structure probabilities. The amino acid residues with disorder probability above the threshold (dashed line) are predicted to be disordered. (B) Gel filtration profile of PfELC (red) and TgELC2 (blue) on a Superdex

200 5/150 column. PfELC elutes at a smaller elution volume, suggesting that it has a larger hydrodynamic radius compared to TgELC2. (C) Far-UV circular dichroism spectrum of PfELC (red) and TgELC2 (blue) shows that PfELC has a lower  $\alpha$ -helical and higher random coil content compared to TgELC2. (D) Elution profile of on-line SEC-SAXS measurement of PfELC using a Superdex 200 5/150 column with the region used for the analysis highlighted in grey. (E) Recorded SAXS curves of isolated PfELC and TgELC2 indicate conformational differences of these homologous proteins. (F) The dimensionless Kratky plot shows that TgELC2 is more compact than PfELC. This is evident because the maximum is considerably closer to  $sR_g = \sqrt{3}$  for TgELC2 than PfELC and the plot converges closer to zero in case of TgELC2. (G) Backbone dynamics of PfELC on a picosecond to nanosecond time scale. Heteronuclear NOE ( $\{^1\text{H}\}$ - $^{15}\text{N}$  NOE) of PfELC on a residue basis. The C-terminus of PfELC is disordered as indicated by the low heteronuclear NOEs for this region. Residues are colored according to secondary structure elements (four  $\alpha$ -helices: from N terminus red, orange, violet, cyan, random coil/loop residues are green, unassigned C-terminal residues in grey). (H) Experimental small angle X-ray scattering curve of PfELC (red) and calculated scattering (black line) from the crystal structure of the PfELC monomer fit with a  $X^2$  value of 1.37, confirming that the protein is a structurally rigid globular monomer in solution. (I) SDS-PAGE gel with PfELC-N samples dialyzed against buffers with varying concentration of TCEP and subsequently alkylated by 2-iodoacetamide and dimer of PfELC-N formed by a cysteine bond between two symmetry related molecules. The results show that the protein is monomeric at the concentration of TCEP used for its biophysical characterization. (J) Overlay of  $^{15}\text{N}$  HSQC spectra of full-length PfELC (red) and its N-terminal construct PfELC-N (black), indicating that the construct PfELC-N is identical to the N-terminal domain of full-length PfELC. Assigned resonances are labeled.

### Supplementary Fig. 3

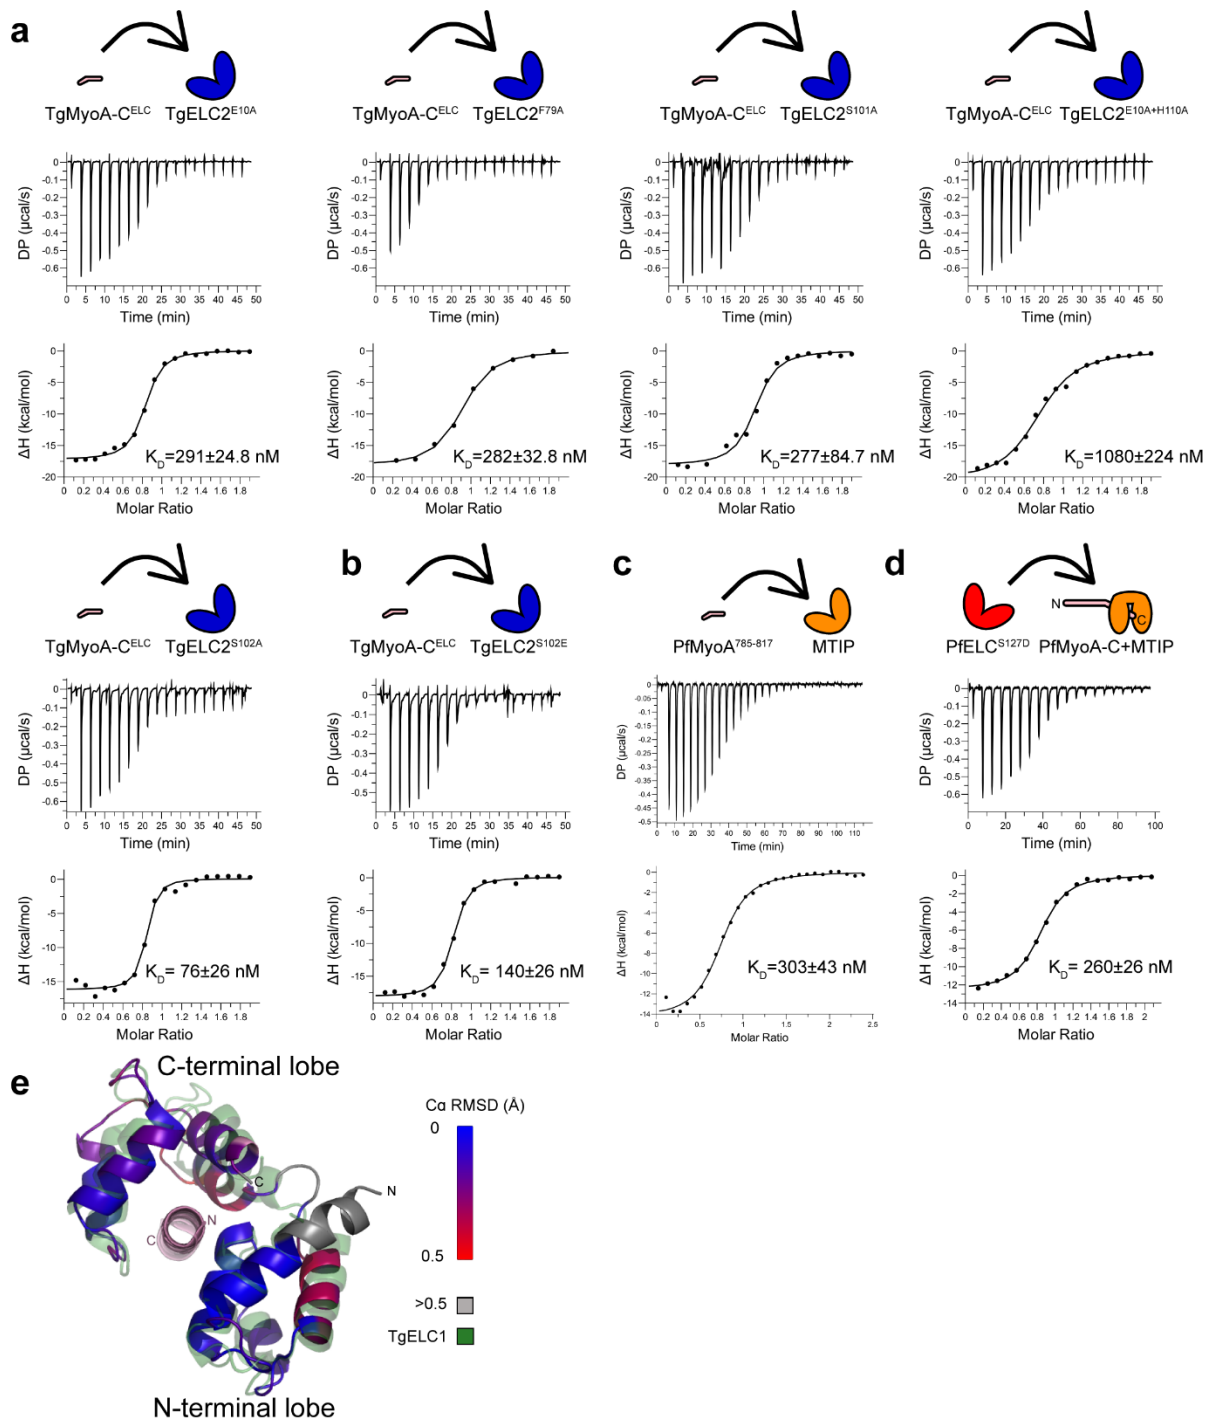

(A) Isothermal titration calorimetry of TgELC2 mutants binding to TgMyoA-C<sup>ELC</sup>. Individual mutations of polar residues (E10A, F79A, S101A, S102A) of TgELC2 interacting with TgMyoA-C<sup>ELC</sup> do not cause major changes in the affinity of the two components, but the double mutant TgELC2E10A+H110A shows a substantially lower affinity. (B) Isothermal titration calorimetry of TgELC2 phosphomimetic mutant S102E leads to a small increase of the

resulting  $K_D$  which suggests that phosphorylation of S102 is unlikely to regulate complex formation. (C) Isothermal titration calorimetry of PfMyoA<sup>785-815</sup> titrated into MTIP. (D) Isothermal titration calorimetry of PfELC phosphomimetic mutant S127E causes a twofold decrease in  $K_D$ . (E) Structural alignment of TgELC1 and PfELC from the crystal structure of their complexes shows that the C-terminal lobe and helix 4 of PfELC display different conformation than TgELC1.

## Supplementary Fig. 4

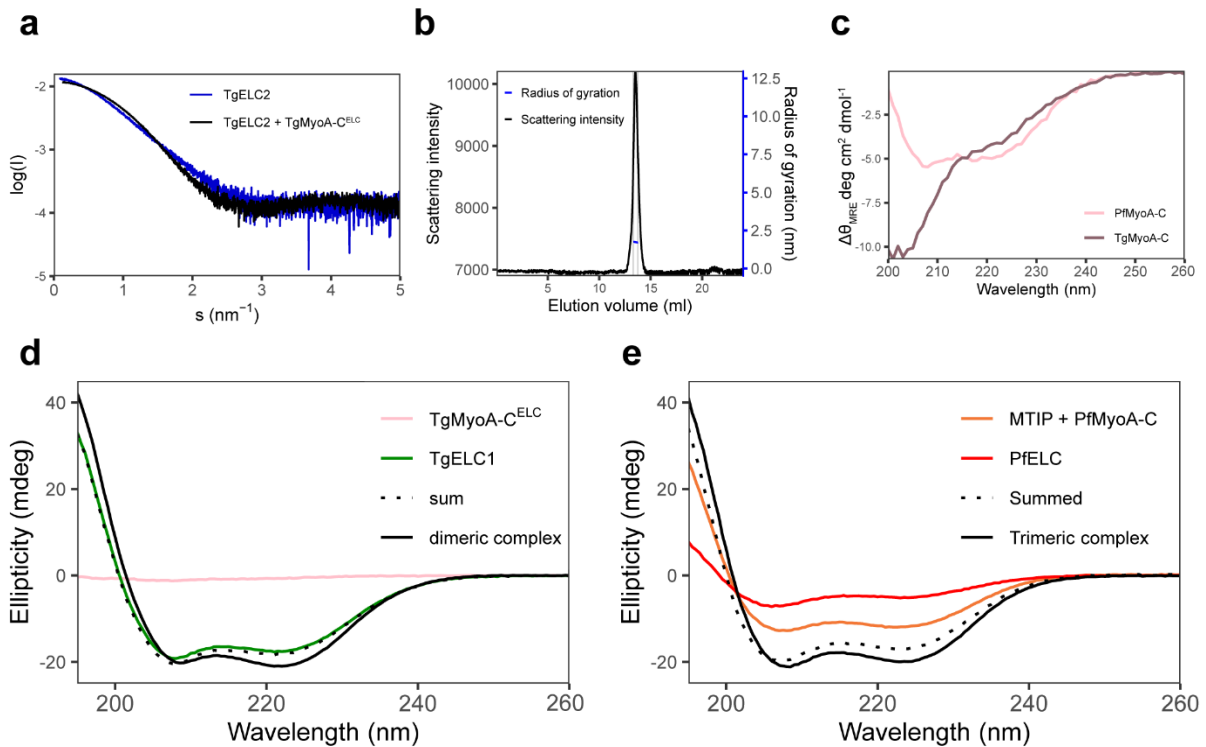

(A) Small Angle X-ray scattering profiles of TgELC2 (blue) and in complex with TgMyoA-C (black) show conformational changes upon interaction. (B) Elution profile of on-line SEC-SAXS measurement of TgELC2 using a Superdex 200 10/300 column with the region used for the analysis highlighted in grey. (C) Far-UV CD spectra of both PfMyoA-C (pink) and TgMyoA-C (violet) indicate that the unbound C-terminus of MyoA is disordered (TgMyoA) or partially disordered (PfMyoA). (D) Far-UV CD data indicate that TgELC1 induces  $\alpha$ -helical structure in TgMyoA upon binding. The individual spectra of TgELC1 (green) and TgMyoA<sup>ELC</sup> (pink) do not sum up (dotted black line) to the spectrum of their dimeric complex (black continuous line), which has more pronounced features of  $\alpha$ -helical secondary structure with lower ellipticity at 222 nm and higher ellipticity at 195 nm. (E) The far-UV CD data show that, similarly to TgELCs, the amount of  $\alpha$ -helical structure increases upon binding of PfELC to MyoA C-terminus. The data were collected in a 1 mm cuvette at a concentration of 5  $\mu\text{M}$  of each component in 10 mM NaP (pH 7.5), 150 mM NaF and 0.25 mM TCEP at 20°C.

## Supplementary Fig. 5

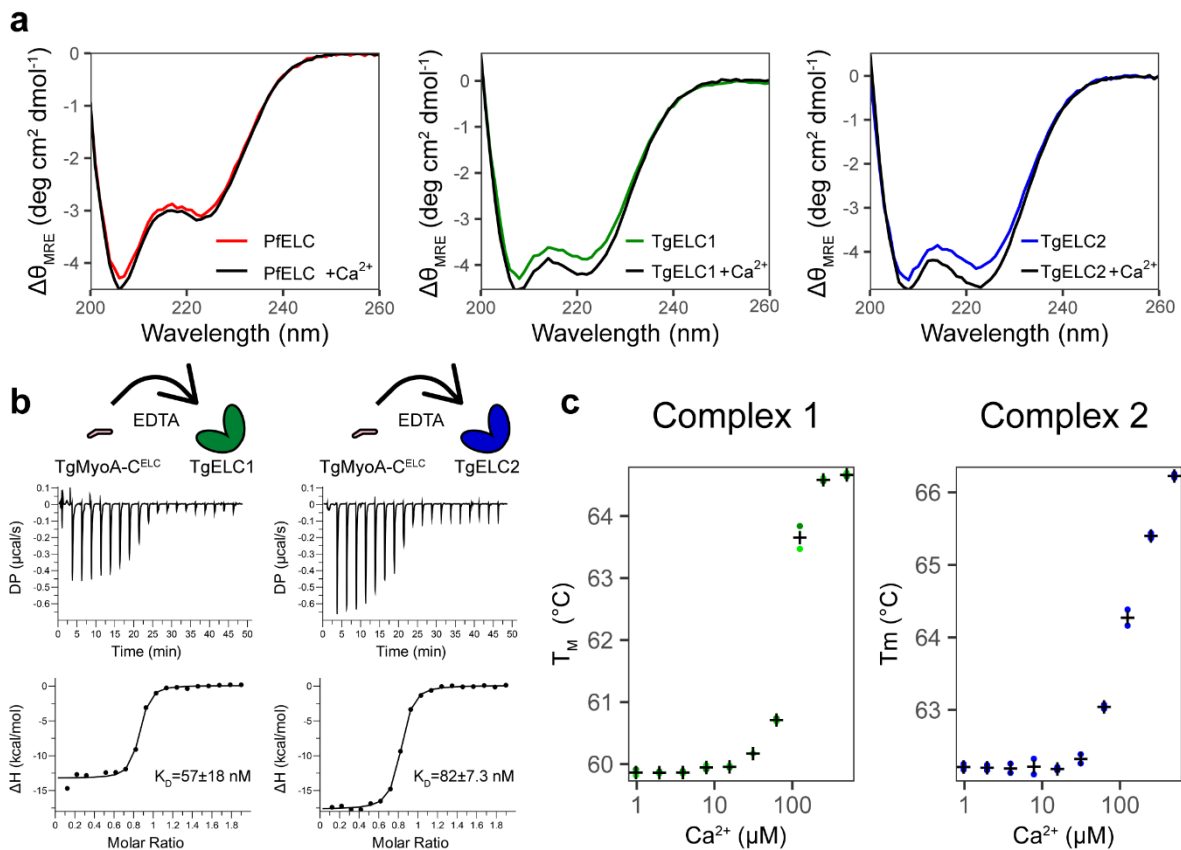

(A) Comparison of far-UV circular dichroism spectra of individual ELC proteins in presence and absence of calcium ions show that calcium does not significantly alter the secondary structure of the ELCs. (B) Binding isotherms of MyoA-C<sup>ELC</sup> titrated to TgELC1 or TgELC2 in the presence of 5mM EDTA shows that calcium does not have a major influence on the affinity of TgELC2 to the myosin A neck. (C) Stability dependence of the trimeric complex upon addition of increasing concentrations of calcium illustrated by the increase in  $T_M$  (°C). Stability data for complex one are shown on the left and for complex two on the right. The colored points are individual measurements and “+” represents the average. The experiment shows that the stability of the trimeric complex is greatly enhanced by the addition of calcium in a concentration-dependent manner.

## Supplementary Fig. 6

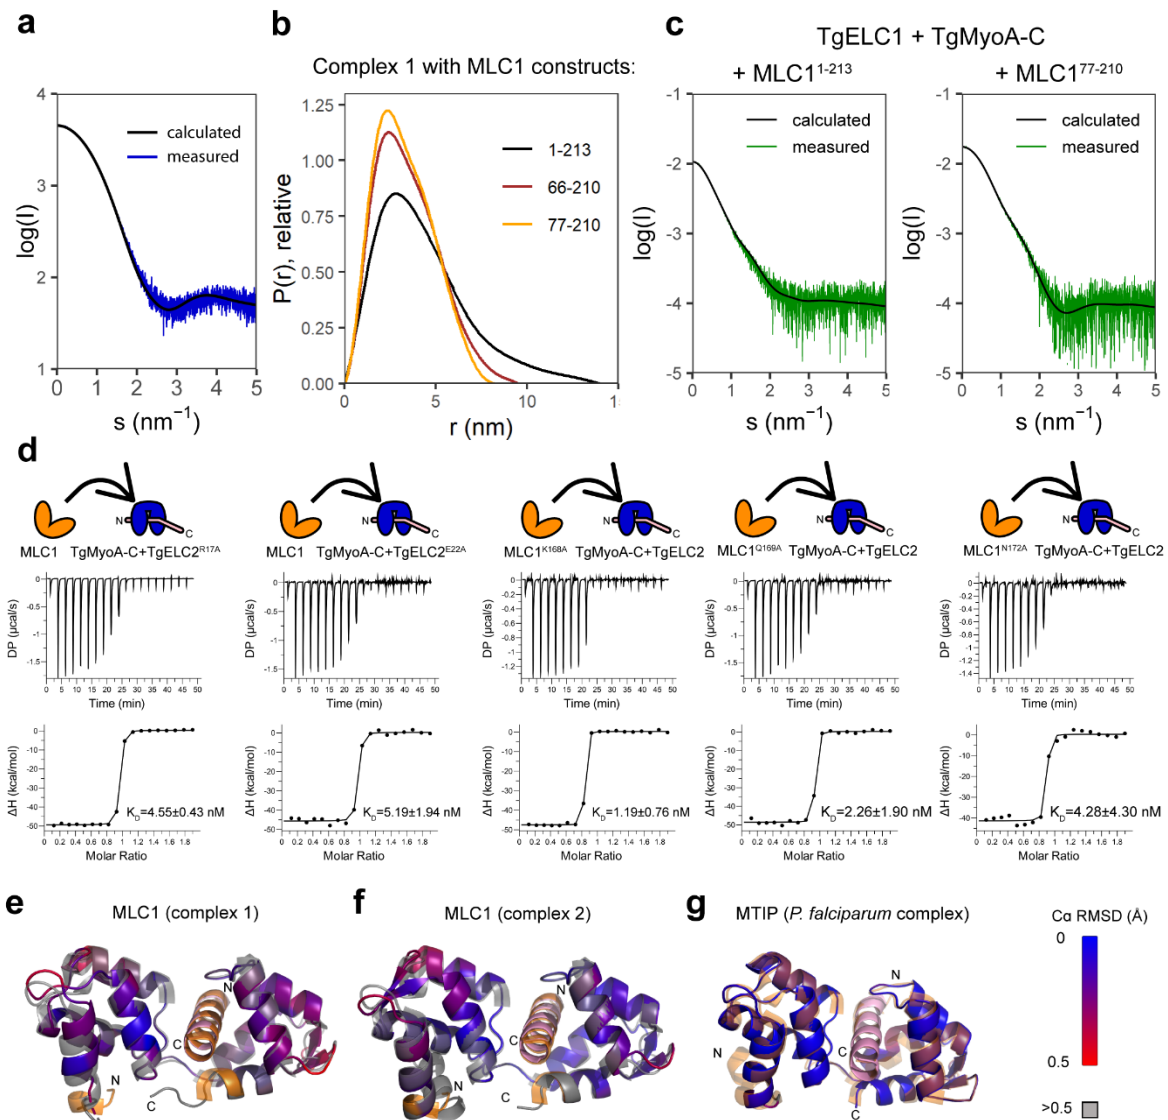

(A) Experimental small angle X-ray scattering curve of TgELC2 bound to TgMyoA-C<sup>ELC</sup> (blue). The fit to the scattering pattern computed from the crystal structure of complex 2 omitting MLC1 (black line,  $\chi^2 = 1.16$ ) shows that TgELC2 does not undergo major conformational changes upon binding of MLC1 and the formation of the trimeric complex. (B) The distance distribution plots of complex 1 calculated from experimental small angle X-ray scattering data change by shortening the MLC1 N-terminal domain, indicating flexibility of MLC1 upstream of residue 77. The distance distribution is narrower upon N-terminal truncation of MLC1, with  $d_{max}$  decreasing from 14 nm (complex 1 with full-length MLC1<sup>1-213</sup>) to 9.5 nm (MLC1<sup>66-210</sup>) and further to 8.2 nm (MLC1<sup>77-210</sup>). (C) Experimental small angle X ray scattering curves of



complex 2 with the short MLC1 construct (MLC1<sup>77-210</sup>) and full-length MLC1 (MLC1<sup>1-210</sup>). The calculated scattering curve computed from the crystal structure of complex 1 fits the scattering data of complex 1 with construct MLC1<sup>77-210</sup> with  $\chi^2 = 1.04$ , suggesting that MLC1 residues 77-210 form a folded and rigid entity in the complex. The experimental data of complex 1 with full length MLC1<sup>1-213</sup> fit the calculated scattering data from the crystal structure of complex 1 and N-terminal MLC1 residues modelled by CORAL with  $\chi^2 = 1.15$ . (D) ITC binding isotherms of MLC1 titrated to the TgELC2/TgMyoA-C pre-complex. TgELC2 or MLC1 residues forming the binding interface were mutated individually and their affinity was measured to assess the contribution to the binding interface within the trimeric complex. The measured mutants were TgELC2 mutants R17A and E22A, and MLC1 mutants K168A, Q169A and N172A. The binding affinities were in the low nanomolar range. (E-G) Overlays of MLC1 or MTIP derived from the published dimeric complex structure in grey (PDB ID 5vt9 and 4aom, orange) with the protein chains of the trimeric complex structures show that MLC1 and MTIP do not undergo any major structural changes upon ELC binding. The dimeric complex structure agrees with a backbone RMSD of 0.96 Å and 0.75 Å with complex 1 and complex 2, respectively and 1.41 Å with *P. falciparum* complex. The key interactions of TgMyoA with MLC1 are also conserved between the structures of the trimeric and dimeric complexes (R808, H812, R814) with the exception of few weak polar interactions (see Supplementary Table 6). Color code of MLC1 derived from the trimeric complexes according to RMSD deviation of C $\alpha$  is indicated.

## Supplementary Fig. 7

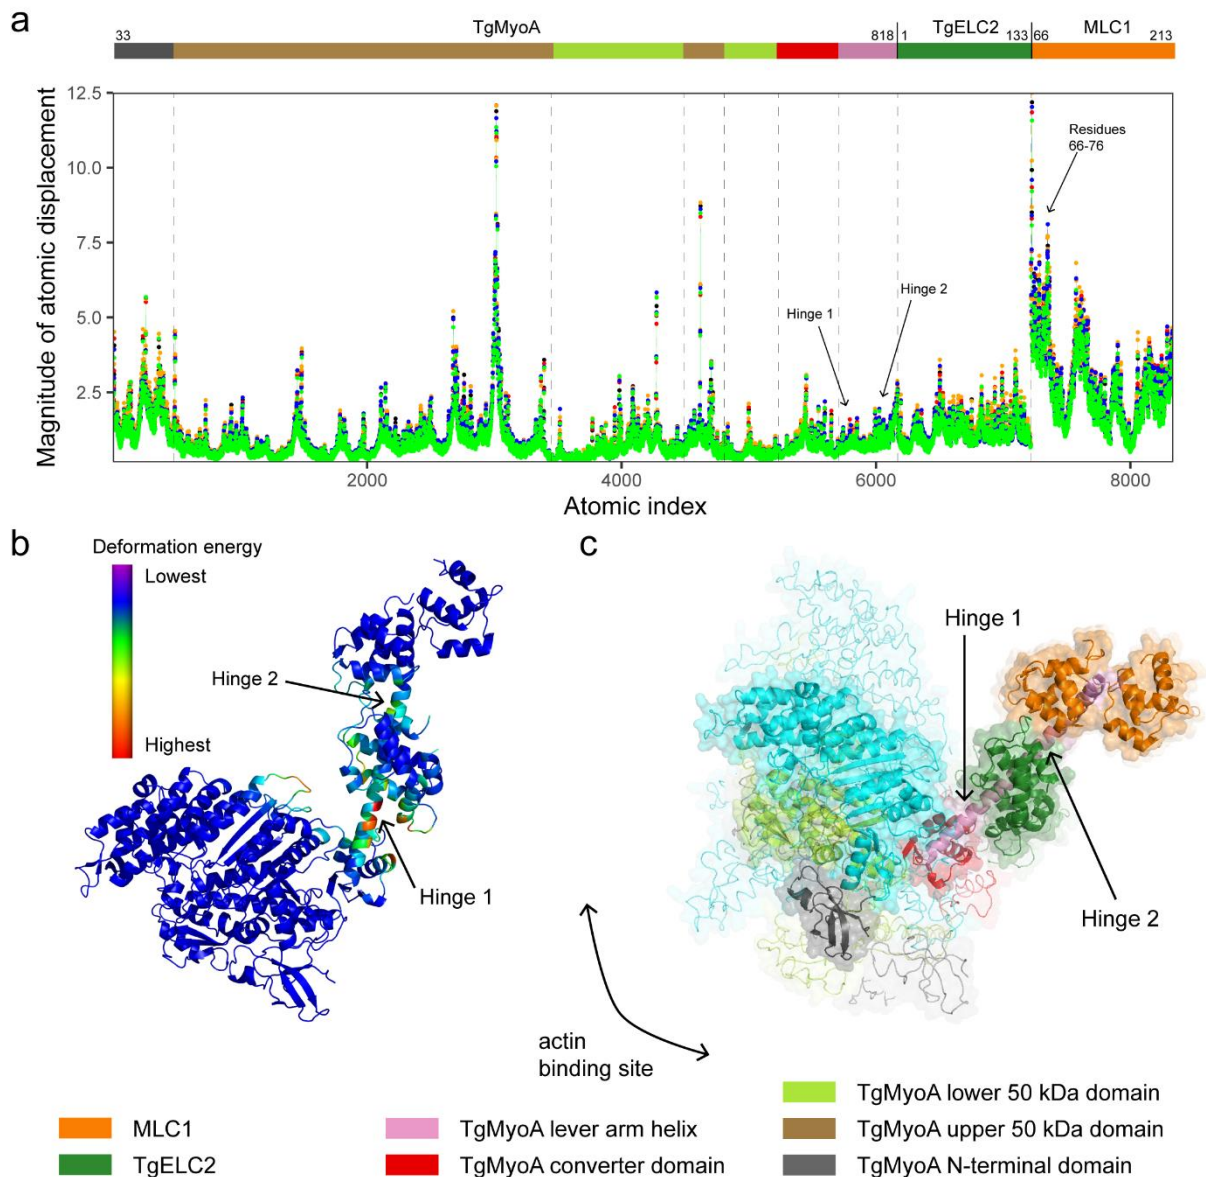

(A) Summary plot of the atomic displacements predicted by NMA based on the five lowest-energy models for complex 2 selected by the lowest clash score. The relative atomic displacement of the individual amino acid residues follows the same pattern in all five models, confirming that the results of the normal mode analysis are independent of the chosen starting conformation or the energy-minimized model. The results for complex 1 are similar (data not shown). (B) The deformation analysis of complex 1 averaged through the 20 lowest-energy modes predicts two main hinge regions, with the hinge 1 (residues 773-777), having the largest contribution to the observed motions. The model is coloured by the deformation energy

from low (violet) to high (red). (C) The ensemble of the structures of complex 2 based on the two lowest-energy modes, which contribute most to the large-scale dynamics of proteins. The original model is drawn in cartoon representation with shown semitransparent surface, whereas the deformed structures are partially transparent and drawn in ribbon representation with faded surface. The structures were aligned on MLC1 to reflect the immobilization of MLC1 in the IMC membrane as in the current model of the glideosome (see Fig. 1a).

**Supplementary Table 1.** A list of published *P. falciparum* and *T. gondii* glideosome protein structures. So far, only structures of individual proteins of the glideosome and two homologous sub-complexes (MTIP/PfMyoA and MLC1/TgMyoA) have been determined.

| <b>Organism</b>      | <b>Protein</b> | <b>Residues</b> | <b>PDB ID</b> | <b>Year</b> | <b>Ref.</b> |
|----------------------|----------------|-----------------|---------------|-------------|-------------|
| <i>P. falciparum</i> | GAP50          | 24-365          | 3tgh          | 2012        | 25          |
| <i>P. falciparum</i> | MyoA           | 2-768           | 6i7d, 6i7e    | 2019        | 28          |
| <i>T. gondii</i>     | MyoA           | 33-778          | 6due          | 2018        | 27          |
| <i>P. falciparum</i> | MTIP+MyoA      | 60-204, 799-816 | 4aom          | 2012        | 26          |
| <i>T. gondii</i>     | MLC1+MyoA      | 66-210, 801-831 | 5vt9          | 2017        | 15          |

**Supplementary Table 2.** Biophysical characterization and comparison of PfELC and TgELC2.

|               | <b>SEC data</b>            | <b>CD data</b>                   |                                 |               | <b>SAXS data</b>                 |                 |                             |
|---------------|----------------------------|----------------------------------|---------------------------------|---------------|----------------------------------|-----------------|-----------------------------|
|               | <b>Elution volume (ml)</b> | <b><math>\alpha</math> helix</b> | <b><math>\beta</math> sheet</b> | <b>random</b> | <b><i>R</i><sub>g</sub> (nm)</b> | <b>MW (kDa)</b> | <b>D<sub>max</sub> (nm)</b> |
| <b>TgELC2</b> | 2.41                       | 41%                              | 15%                             | 45%           | 2.15                             | 17.0            | 6.73                        |
| <b>PfELC</b>  | 2.18                       | 34%                              | 16%                             | 51%           | 2.83                             | 16.3            | 9.50                        |

**Supplementary Table 3.** SAXS sample details, data acquisition parameters, structural parameters and atomistic modelling.

| <b>Sample details</b>                                                            |                                           |                      |                     |                                  |                                    |                                     |                                     |                                     |                                 |
|----------------------------------------------------------------------------------|-------------------------------------------|----------------------|---------------------|----------------------------------|------------------------------------|-------------------------------------|-------------------------------------|-------------------------------------|---------------------------------|
| Sample                                                                           | PfELC-N                                   | PfELC                | TgELC2              | TgELC2 + TgMyoA-C <sup>ELC</sup> | Complex 1 (MLC1 <sup>1-213</sup> ) | Complex 1 (MLC1 <sup>66-210</sup> ) | Complex 1 (MLC1 <sup>77-210</sup> ) | Complex 2 (MLC1 <sup>66-210</sup> ) | Complex of <i>P. falciparum</i> |
| Organism                                                                         | <i>P. falciparum</i>                      | <i>P. falciparum</i> | <i>T. gondii</i>    | <i>T. gondii</i>                 | <i>T. gondii</i>                   | <i>T. gondii</i>                    | <i>T. gondii</i>                    | <i>T. gondii</i>                    | <i>P. falciparum</i>            |
| Source                                                                           | <i>E. coli</i> BL21                       | <i>E. coli</i> BL21  | <i>E. coli</i> BL21 | <i>E. coli</i> BL21              | <i>E. coli</i> BL21                | <i>E. coli</i> BL21                 | <i>E. coli</i> BL21                 | <i>E. coli</i> BL21                 | <i>E. coli</i> BL21             |
| UniProt ID                                                                       | Q8IJM4                                    | Q8IJM4               | B9PZ33              | B9PZ33 + S8G527                  | XYZ* + S8G527 + Q95UJ7             | XYZ* + S8G527 + Q95UJ7              | XYZ* + S8G527 + Q95UJ7              | B9PZ33 + S8G527 + Q95UJ7            | Q8IJM4 + Q8IDR3 + Q8I4Q8        |
| Extinction coefficient $\epsilon$ (at 280 nm, M <sup>-1</sup> cm <sup>-1</sup> ) | 11460                                     | 8480                 | 16760               | 25240                            | 49850                              | 35870                               | 35870                               | 30370                               | 35870                           |
| Molecular weight from chemical composition (Da)                                  | 9011.2                                    | 15763.9              | 15471.5             | 20681.34                         | 44183.1                            | 37181.1                             | 36619.5                             | 37785.6                             | 37459.5                         |
| Concentration (analysis or injection, mg/ml)                                     | 3.75                                      | 10                   | 5                   | 10                               | 3.9                                | 5.6                                 | 4.8                                 | 15.5                                | 8.2                             |
| Solvent composition                                                              | 20mM HEPES pH 7.5, 150mM NaCl, 0.5mM TCEP |                      |                     |                                  |                                    |                                     |                                     |                                     |                                 |
| <b>SAS data collection parameters</b>                                            |                                           |                      |                     |                                  |                                    |                                     |                                     |                                     |                                 |
| Beamline                                                                         | P12, DESY/EMBL, Hamburg (Germany)         |                      |                     |                                  |                                    |                                     |                                     |                                     |                                 |
| Detector                                                                         | Pilatus 6M                                |                      |                     |                                  |                                    |                                     |                                     |                                     |                                 |
| Energy (keV)                                                                     | 10.0                                      |                      |                     |                                  |                                    |                                     |                                     |                                     |                                 |
| Sample-to-detector distance (mm)                                                 | 3000                                      |                      |                     |                                  |                                    |                                     |                                     |                                     |                                 |
| $q$ -measurement range (Å <sup>-10</sup> )                                       | 0.003 – 0.732                             |                      |                     |                                  |                                    |                                     |                                     |                                     |                                 |
| Absolute scaling method                                                          | Relative to the scattering of pure water  |                      |                     |                                  |                                    |                                     |                                     |                                     |                                 |
| Method for monitoring radiation damage                                           | Frame comparison                          |                      |                     |                                  |                                    |                                     |                                     |                                     |                                 |
| Exposed time for frame                                                           | 1 s (20 x 0.05 s)                         | 900 s (900 x 1 s)    | 1 s (20 x 0.05 s)   | 1500 s (1500 x 1 s)              | 1500 s (1500 x 1 s)                | 1500 s (1500 x 1 s)                 | 1500 s (1500 x 1 s)                 | 1500 s (1500 x 1 s)                 | 1500 s (1500 x 1 s)             |
| Mode                                                                             | Batch                                     | SEC-SAXS             | Batch               | SEC-SAXS                         | SEC-SAXS                           | SEC-SAXS                            | SEC-SAXS                            | SEC-SAXS                            | SEC-SAXS                        |
| Sample temperature (°C)                                                          | 20                                        | 20                   | 20                  | 20                               | 20                                 | 20                                  | 20                                  | 20                                  | 20                              |
| <b>Structural parameters</b>                                                     |                                           |                      |                     |                                  |                                    |                                     |                                     |                                     |                                 |
| Guinier Analysis                                                                 |                                           |                      |                     |                                  |                                    |                                     |                                     |                                     |                                 |
| I(0) (cm <sup>-1</sup> )                                                         | 0.007±0.001                               | 0.007±0.001          | 0.013±0.001         | 0.021±0.001                      | 0.011±0.001                        | 0.029±0.001                         | 0.017±0.001                         | 0.050±0.001                         | 0.037±0.001                     |
| R <sub>g</sub> (Å)                                                               | 13.6±1.9                                  | 27.2±1.7             | 21.4±0.5            | 17.3±0.1                         | 32.4±0.2                           | 26.7±3.0                            | 25.2±4.0                            | 26.7±3.2                            | 27.4±1.8                        |
| q-range (Å <sup>-1</sup> )                                                       | 0.01-0.09                                 | 0.01-0.05            | 0.01-0.06           | 0.01-0.07                        | 0.01-0.04                          | 0.01-0.05                           | 0.01-0.05                           | 0.01-0.05                           | 0.01-0.05                       |
| Fidelity (Quality of fit parameter, <i>AutoRg</i> )                              | 0.96                                      | 0.93                 | 0.97                | 0.97                             | 0.93                               | 0.96                                | 0.92                                | 0.98                                | 0.96                            |
| Molecular weight (Da)**                                                          |                                           |                      |                     |                                  |                                    |                                     |                                     |                                     |                                 |
| Rel. to standard (BSA, 66 kDa)                                                   | 9762                                      | n.d.                 | 16824               | n.d.                             | n.d.                               | n.d.                                | n.d.                                | n.d.                                | n.d.                            |
| From V <sub>c</sub>                                                              | 8486                                      | 16299                | 16991               | 16223                            | 38396                              | 34547                               | 32210                               | 35435                               | 35029                           |
| From MoW                                                                         | 7311                                      | 15636                | 16700               | 14536                            | 27615                              | 35069                               | 32610                               | 33378                               | 36809                           |
| P(r) analysis                                                                    |                                           |                      |                     |                                  |                                    |                                     |                                     |                                     |                                 |
| I(0) (cm <sup>-1</sup> )                                                         | 0.007±0.001                               | 0.007±0.001          | 0.013±0.001         | 0.021±0.001                      | 0.011±0.001                        | 0.029±0.001                         | 0.017±0.001                         | 0.050±0.001                         | 0.038±0.001                     |

|                                                  |                                                                             |           |                                 |           |                                       |                                  |                     |                     |           |
|--------------------------------------------------|-----------------------------------------------------------------------------|-----------|---------------------------------|-----------|---------------------------------------|----------------------------------|---------------------|---------------------|-----------|
| R <sub>g</sub> (Å)                               | 13.7±0.01                                                                   | 28.3±0.42 | 21.5±0.05                       | 17.3±0.01 | 35.0±0.24                             | 27.2±0.05                        | 25.5±0.05           | 27.4±0.04           | 28.4±0.05 |
| d <sub>max</sub> (Å)                             | 43.0                                                                        | 95.0      | 67.3                            | 54.9      | 140                                   | 95.0                             | 82.0                | 100                 | 107       |
| q-range (Å <sup>-1</sup> )                       | 0.01-0.59                                                                   | 0.01-0.30 | 0.01-0.37                       | 0.01-0.46 | 0.01-0.25                             | 0.01-0.30                        | 0.01-0.32           | 0.01-0.30           | 0.01-0.29 |
| Total quality estimate                           | 0.85                                                                        | 0.52      | 0.80                            | 0.86      | 0.71                                  | 0.84                             | 0.91                | 0.79                | 0.78      |
| Porod volume x 10 <sup>3</sup> (Å <sup>3</sup> ) | 11.80                                                                       | 22.81     | 26.72                           | 27.59     | 63.74                                 | 49.68                            | 47.03               | 49.92               | 50.76     |
| <b>Atomistic modelling</b>                       | CRYSQL with constant subtraction and maximum order of harmonics equal to 50 |           |                                 |           |                                       |                                  |                     |                     |           |
| Crystal structures                               | 6tj4, chain A, residues 1-68                                                |           | 6tj7, chains A+C (res. 777-798) |           | 6tj6, chains A+B+C                    | 6tj6, chains A+B (res. 81-214)+C | 6tj7, chains A+B+C  | XXX, chains A+B+C   |           |
| q-range for modelling                            | 0.01-0.50                                                                   |           | 0.01-0.50                       |           | 0.01-0.50                             | 0.01-0.50                        | 0.01-0.50           | 0.01-0.50           | 0.01-0.50 |
| χ <sup>2</sup> , P-value                         | 1.37, 0.00                                                                  |           | 1.16, 0.00                      |           | 1.26, 0.00                            | 1.04, 0.20                       | 2.41, 0.00          | 3.94, 0.00          |           |
| Predicted R <sub>g</sub> (Å)                     | 13.19                                                                       |           | 17.31                           |           | 6.42                                  | 25.67                            | 26.26               | 25.80               |           |
| Vol (Å), Ra (Å), Dro (e Å <sup>-3</sup> )        | 10436, 1.760, 0.030                                                         |           | 22222, 1.780, 0.025             |           | 42336, 1.800, 0.065                   | 46310, 1.400, 0.022              | 46306, 1.800, 0.050 | 45540, 1.800, 0.055 |           |
|                                                  | CORAL hybrid rigid body modeling                                            |           |                                 |           |                                       |                                  |                     |                     |           |
| Starting crystal structures                      |                                                                             |           |                                 |           | 6tj6, chains A+B <sup>81-210</sup> +C |                                  |                     |                     |           |
| Flexible residues                                |                                                                             |           |                                 |           | 1-80 of chain B                       |                                  |                     |                     |           |
| q-range for modelling                            |                                                                             |           |                                 |           | 0.01-0.58                             |                                  |                     |                     |           |
| χ <sup>2</sup> , P-value                         |                                                                             |           |                                 |           | 1.15, 0.00                            |                                  |                     |                     |           |
| <b>SASBDB IDs for data and models</b>            |                                                                             |           |                                 |           |                                       |                                  |                     |                     |           |
|                                                  | SASDH64                                                                     | SASDH74   | SASDH84                         | SASDH94   | SASDHA4                               | SASDHB4                          | SASDHC4             | SASDHD4             | SASDHE4   |

\* the protein with accession number *TGME49\_069440* in ToxoDB database has been, as our data show, incorrectly split to two different genes and is not available in the current versions of database.

\*\* calculated from BSA standard for batch mode samples, and *V<sub>c</sub>* and *MoW* volume estimates for SEC-SAXS samples, using the appropriate functions in ATSAS

**Supplementary table 4. NMR and refinement statistics for PfELC (residues 1-74).**

|                                         | Protein         |
|-----------------------------------------|-----------------|
| NMR distance and dihedral constraints   |                 |
| Distance constraints                    | 2320            |
| Total NOE                               | 2320            |
| Intra-residue                           | 900             |
| Inter-residue                           | 1420            |
| Sequential ( $ i-j  = 1$ )              | 324             |
| Medium-range ( $ i-j  < 4$ )            | 373             |
| Long-range ( $ i-j  > 5$ )              | 723             |
| Intermolecular                          | 0               |
| Hydrogen bonds                          | 0               |
| Total dihedral angle restraints         | 118             |
| $\phi$                                  | 59              |
| $\psi$                                  | 59              |
| Structure statistics                    |                 |
| Violations (mean and s.d.)              |                 |
| Distance constraints (Å)                | 0.03 ± 0.02     |
| Dihedral angle constraints (°)          | 1.2 ± 0.5       |
| Max. dihedral angle violation (°)       | 16.5            |
| Max. distance constraint violation (Å)  | 1.53            |
| Deviations from idealized geometry      |                 |
| Bond lengths (Å)                        | 0.0023 ± 0.0004 |
| Bond angles (°)                         | 0.38 ± 0.06     |
| Impropers (°)                           | 0.3 ± 0.1       |
| Average pairwise r.m.s. deviation** (Å) |                 |
| Heavy                                   | 1.23 ± 0.14     |
| Backbone                                | 0.87 ± 0.11     |

\*\* "Pairwise r.m.s. deviation was calculated among 10 refined structures."



## Supplementary methods

### Oligos used for cloning

#### Plasmodium falciparum MTIP primers for LIC cloning into pNIC28 Bsa4 vector

MTIP\_FL\_N28\_Fw TACTTCCAATCCATGAAACAAGAATGCAATGTATGTTATTTT  
MTIP\_FL\_N28\_Rv TATCCACCTTTACTGTTATTGTAATATATCTTCACAGAATAATTTGT

#### Plasmodium falciparum MTIP-S primers for Slice cloning into pNIC28 Bsa4 vector

MTIPTr\_Nt\_SliceFW ggtgtagatctgggtaccgagaacctgtactccaatccatgGAATCAGTTGCTGACATA  
MTIPTr\_NtSliceRv tgtcgacggagctcgaattcggatccgatccaccttactgTTATTGTAATATATCTTCACAGA

A

#### Plasmodium falciparum ELC primers for Slice cloning into pNIC28 Bsa4 vector

10175\_FL\_Nt\_Fw ggtgtagatctgggtaccgagaacctgtactccaatccatgATGGCATCTGATATGG  
10175\_FL\_Nt\_Rv tgtcgacggagctcgaattcggatccgatccaccttactgTTATATCGATTCCGTTAA

#### Plasmodium falciparum ELC-N primers for LIC cloning into pNIC28 Bsa4 vector

pNIC28\_ELC\_LIC\_Fw TACTTCCAATCCATGGCATCTGATATGGAAGAAAAATTTAGAGA  
pNIC28\_ELC\_LIC\_N74\_Rv TATCCACCTTTACTGTTAATTAATATGTTAAATGGTTGTTTCATAGTTGTAG

TG

#### Plasmodium falciparum PfMyoA-C primers for restriction cloning into pETM11 SUMO3 vector

PfMyoA\_SUMO\_Slice\_FW ttcagcaacagaccggtgatccGTTGAATGGGAAAATTGTGTGAGT  
PfMyoA\_SUMO\_Slice\_RV gtgctcgagtcgcccgaagcttTTATACCATTTTTTTTCTTATATGAGC

#### Toxoplasma gondii TgMyoA-C primers for restriction cloning into pET GB-1a vector

TgMyoA\_pep1\_FW AAAACCATGGCTTCTTCTTGGGAGCCTCTCGTCTCAGTGCTCGAGGCGTA  
CTACGCTGGCAGACGCCACAAGAAGCAGCTGC  
TgMyoA\_pep1\_RV AAAAGGATCCTTACACCAGGTGTCTGCGGATGTGAGCCTGGGCGCGAAT  
GATGAAGGGGGTCTTTTTTCAGCAGCTGCTTCTTG

#### Toxoplasma gondii TgMLC1 short constructs primers for LIC cloning into pNIC CTHF vector

pNIC\_CTHF\_TgMLC1\_66\_FW TTAAGAAGGAGATATACTATGGCAGACGAAGACATGCAG  
pNIC\_CTHF\_TgMLC1\_77\_FW TTAAGAAGGAGATATACTATGGTGGAGGCCGACGAAATG  
pNIC\_CTHF\_TgMLC1\_210\_RV GATTGGAAGTAGAGGTTCTCTGCCTCGAGCATTGCCTTGC

#### Plasmodium falciparum PfELC primers to create mutation S127D by blunt end PCR

PfELC\_S127D\_BEfw TCAAAAATTAACGGAATCGATATAACagta  
PfELC\_S127D\_BErv TCTACTGTCTTAAGGTTAAGGTTGATTTAT

#### Toxoplasma gondii TgELC1 primers for extending the purchased gene

ELC1-part1\_FW TACTTCCAATCCATGACCTGCCCGCCGCGTGTTTCGTGAAGCGTTCCGCGCT  
GTTCGACACCGAC  
ELC1-part2\_RV CCGCAAGAACGGATCGCCAGAACCAGGTCACGACCAGAGATTTACCGT  
CACCGTCGGTGTGCAACAGCG  
ELC1-part3\_FW GCGATCCGTTCTTGCGGTGTTTCTCCGACCCCGACGAAATCAAAGCGCT  
GCCGatgTCAATGGCGTGGCC

#### Toxoplasma gondii TgELC1 primers for Slice cloning into pNIC28 Bsa4

TgELC1\_Slice\_FW                    ggtgtagatctgggtaccgagaacctgtactccaatccATGACCTGCCCGCCGCG  
TgELC1\_Slice\_RV                    tgtcgacggagctcgaattcggatccgatccacctttactgTTATTTTCAGCAGCATCTTGACAA  
AG

Toxoplasma gondii TgELC2 primers for single amino acid mutations by blunt-end PCR

TgELC2\_E10A\_BErv                    GCGCGCGCTTTTTGTTCGAC  
TgELC2\_E10A\_BEfw                    GGCATTCAAGCTTTTCGATCGC  
TgELC2\_R17A\_BErv                    GCATCGAAAAGCTTGAATGCCTCG  
TgELC2\_R17A\_BEfw                    GAATGGTGATGGCGAGTTAACG  
TgELC2\_E22A\_BErv                    GCGCCATCACCATTGCGA  
TgELC2\_E22A\_BEfw                    GTTAACGCATCAAGAAGCTGTCC  
TgELC2\_F79A\_BErv                    GCAGGCGCAAACAGTTTGATCAG  
TgELC2\_F79A\_BEfw                    GGATCGCAAAAATGATGGCACGA  
TgELC2\_D80A\_BErv                    GCGAAAGGCGCAAACAGTTTGATCAG  
TgELC2\_D80A\_BEfw                    GCGCAAAAATGATGGCACGATC  
TgELC2\_G101A\_BErv                    GCGCAGAGAGTCTTCATGACTTGAGC  
TgELC2\_G101A\_BEfw                    GTCTATGACGGAGGAGGACATCG  
TgELC2\_H110A\_BErv                    GCATCGATGTCCTCCTCCGTCA  
TgELC2\_H110A\_BEfw                    GCTCATTAACAAGCGGATCCAAACAAC

Toxoplasma gondii MLC1 primers for single amino acid mutations by blunt-end PCR

TgMLC1\_K168A\_BEfw                    GCAGATGGGGAACATCCTCA  
TgMLC1\_K168A\_BErv                    GCGCGCGTCAGGTAACCG  
TgMLC1\_Q169A\_BEfw                    GATGGGGAACATCCTCATGACC  
TgMLC1\_Q169A\_BErv                    GCCTTGCGCGTCAGGTAACCG  
TgMLC1\_N172A\_BEfw                    GATCCTCATGACCTACGGAGAGC  
TgMLC1\_N172A\_BErv                    GCCCCCATCTGCTTGCGCG

Primers for re-cloning gene cassettes into pPYC vector

NdeI\_to\_pPYC\_FW                    AAAAcatatgcaccatcatcatcatcattc  
XbaI\_to\_pPYC\_RV                    AAAAtctagacgacggagctcgaattcggga
