# Supplementary material for: Structural role of essential light chains in the apicomplexan glideosome
Source: PubMed Central journal article supplement (PMC7555893; doi:10.1038/s42003-020-01283-8), 2020-10-13
Supplement: 42003_2020_1283_MOESM2_ESM.pdf [file 42003_2020_1283_MOESM2_ESM.pdf]

## **Description of Additional Supplementary Files**

**Supplementary data:** Interacting residues in the glideosome subcomplexes
