# Supplementary material for: Structural role of essential light chains in the apicomplexan glideosome
Source: PubMed Central journal article supplement (PMC7555893; doi:10.1038/s42003-020-01283-8), 2020-10-13
Supplement: 42003_2020_1283_MOESM3_ESM.pdf [file 42003_2020_1283_MOESM3_ESM.pdf]

Supplementary Data. Interacting residues in the glideosome subcomplexes.

| Complex 1             |                  |           |                   | Complex 2             |                  |           |                   | Complex 1f            |                  |           |                   | 5vt9                  |                  |           |                   | Plasmodium trimeric complex |                  |           |                   |
|-----------------------|------------------|-----------|-------------------|-----------------------|------------------|-----------|-------------------|-----------------------|------------------|-----------|-------------------|-----------------------|------------------|-----------|-------------------|-----------------------------|------------------|-----------|-------------------|
| TgELC1/TgMyoA         | Interface:       | 1299.5    | (Å <sup>2</sup> ) | TgELC2/TgMyoA         | Interface:       | 1236.9    | (Å <sup>2</sup> ) | TgELC1/TgMyoA         | Interface:       | 1257.1    | (Å <sup>2</sup> ) | TgELC1/TgMyoA         | Interface:       | 1257.1    | (Å <sup>2</sup> ) | PfELC/PfMyoA                | Interface:       | 1421.2    | (Å <sup>2</sup> ) |
| <b>Salt bridges</b>   |                  |           |                   | <b>Salt bridges</b>   |                  |           |                   | <b>Salt bridges</b>   |                  |           |                   | <b>Salt bridges</b>   |                  |           |                   |                             |                  |           |                   |
| ##                    | TgMyoA           | Dist. [Å] | TgELC1            | ##                    | TgMyoA           | Dist. [Å] | TgELC2            | ##                    | TgMyoA           | Dist. [Å] | TgELC1            | ##                    | TgMyoA           | Dist. [Å] | TgELC1            | ##                          | PfMyoA           | Dist. [Å] | PfELC             |
| 1                     | C:ARG 793[ NH1 ] | 3.96      | A:GLU 114[ OE1 ]  | 1                     | C:ARG 794[ NE ]  | 3.97      | A:ASP 107[ OD2 ]  | 1                     | C:ARG 793[ NH1 ] | 3.58      | A:GLU 114[ OE2 ]  | 1                     | C:ARG 793[ NH1 ] | 3.58      | A:GLU 114[ OE1 ]  | 1                           | C:LYS 792[ NZ ]  | 3.86      | A:ASP 105[ OD1 ]  |
| 2                     | C:ARG 793[ NH2 ] | 2.67      | A:GLU 114[ OE2 ]  | 2                     | C:ARG 794[ NH2 ] | 2.99      | A:ASP 107[ OD2 ]  | 2                     | C:ARG 793[ NH2 ] | 3.30      | A:GLU 114[ OE1 ]  | 2                     | C:ARG 793[ NH2 ] | 3.30      | A:GLU 114[ OE1 ]  | 2                           | C:LYS 794[ NZ ]  | 3.86      | A:ILE 134[ O ]    |
| 3                     | C:ARG 793[ NH2 ] | 2.64      | A:GLU 114[ OE1 ]  | 3                     | C:LYS 796[ NZ ]  | 3.13      | A:GLU 10[ OE1 ]   | 3                     | C:ARG 793[ NH2 ] | 3.45      | A:GLU 114[ OE2 ]  | 3                     | C:ARG 793[ NH2 ] | 3.45      | A:GLU 114[ OE2 ]  | 3                           | C:GLU 785[ OE1 ] | 3.16      | A:ARG 100[ NE ]   |
| 4                     | C:ARG 794[ NE ]  | 3.01      | A:GLU 107[ OE2 ]  | 4                     | C:LYS 796[ NZ ]  | 2.80      | A:GLU 10[ OE2 ]   | 4                     | C:ARG 794[ NE ]  | 2.98      | A:GLU 107[ OE2 ]  | 4                     | C:ARG 794[ NE ]  | 2.98      | A:GLU 107[ OE2 ]  | 4                           | C:GLU 785[ OE1 ] | 3.49      | A:ARG 100[ NH2 ]  |
| 5                     | C:ARG 794[ NH2 ] | 3.90      | A:GLU 107[ OE2 ]  |                       |                  |           |                   | 5                     | C:ARG 794[ NH2 ] | 3.90      | A:GLU 107[ OE2 ]  | 5                     | C:ARG 794[ NH2 ] | 3.90      | A:GLU 107[ OE2 ]  |                             |                  |           |                   |
| 6                     | C:LYS 796[ NZ ]  | 3.10      | A:GLU 9[ OE1 ]    |                       |                  |           |                   | 6                     | C:LYS 796[ NZ ]  | 3.72      | A:GLU 9[ OE1 ]    | 6                     | C:LYS 796[ NZ ]  | 3.72      | A:GLU 9[ OE1 ]    |                             |                  |           |                   |
| 7                     | C:LYS 796[ NZ ]  | 3.92      | A:GLU 9[ OE2 ]    |                       |                  |           |                   | 7                     | C:LYS 796[ NZ ]  | 3.06      | A:GLU 9[ OE2 ]    | 7                     | C:LYS 796[ NZ ]  | 3.06      | A:GLU 9[ OE2 ]    |                             |                  |           |                   |
| <b>Hydrogen bonds</b> |                  |           |                   | <b>Hydrogen bonds</b> |                  |           |                   | <b>Hydrogen bonds</b> |                  |           |                   | <b>Hydrogen bonds</b> |                  |           |                   |                             |                  |           |                   |
| 1                     | C:TYR 789[ OH ]  | 3.01      | A:LEU 132[ O ]    | 1                     | C:TYR 790[ OH ]  | 3.19      | A:GLN 114[ OE1 ]  | 1                     | C:TYR 789[ OH ]  | 3.30      | A:LEU 132[ O ]    | 1                     | C:TYR 789[ OH ]  | 3.30      | A:LEU 132[ O ]    | 1                           | C:SER 774[ OG ]  | 2.96      | A:GLN 79[ OE1 ]   |
| 2                     | C:TYR 790[ OH ]  | 3.20      | A:GLU 114[ OE1 ]  | 2                     | C:ARG 793[ NH1 ] | 3.61      | A:GLN 114[ OE1 ]  | 2                     | C:TYR 790[ OH ]  | 2.68      | A:GLU 114[ OE1 ]  | 2                     | C:TYR 790[ OH ]  | 2.68      | A:GLU 114[ OE1 ]  | 2                           | C:LYS 790[ NZ ]  | 3.24      | A:SER 34[ O ]     |
| 3                     | C:ARG 793[ NH2 ] | 2.67      | A:GLU 114[ OE2 ]  | 3                     | C:ARG 794[ NH2 ] | 2.99      | A:ASP 107[ OD2 ]  | 3                     | C:ARG 793[ NH1 ] | 3.58      | A:GLU 114[ OE2 ]  | 3                     | C:ARG 793[ NH1 ] | 3.58      | A:GLU 114[ OE2 ]  | 3                           | C:LYS 792[ NZ ]  | 3.86      | A:ASP 105[ OD1 ]  |
| 4                     | C:ARG 793[ NH2 ] | 2.64      | A:GLU 114[ OE1 ]  | 4                     | C:LYS 796[ NZ ]  | 2.80      | A:GLU 10[ OE2 ]   | 4                     | C:ARG 793[ NH2 ] | 3.30      | A:GLU 114[ OE1 ]  | 4                     | C:ARG 793[ NH2 ] | 3.30      | A:GLU 114[ OE1 ]  | 4                           | C:LYS 794[ NZ ]  | 3.00      | A:SER 133[ O ]    |
| 5                     | C:ARG 794[ NE ]  | 3.01      | A:GLU 107[ OE2 ]  | 5                     | C:GLU 787[ OE2 ] | 3.04      | A:SER 102[ N ]    | 5                     | C:ARG 793[ NH2 ] | 3.45      | A:GLU 114[ OE2 ]  | 5                     | C:ARG 793[ NH2 ] | 3.45      | A:GLU 114[ OE2 ]  | 5                           | C:LYS 794[ NZ ]  | 3.86      | A:ILE 134[ O ]    |
| 6                     | C:ARG 794[ NH2 ] | 3.30      | A:LEU 102[ O ]    | 6                     | C:GLU 787[ OE2 ] | 2.79      | A:SER 102[ OG ]   | 6                     | C:ARG 794[ NE ]  | 2.98      | A:GLU 107[ OE2 ]  | 6                     | C:ARG 794[ NE ]  | 2.98      | A:GLU 107[ OE2 ]  | 6                           | C:GLU 785[ OE1 ] | 3.04      | A:ARG 100[ N ]    |
| 7                     | C:GLU 787[ OE1 ] | 3.37      | A:GLU 101[ N ]    | 7                     | C:GLU 787[ OE2 ] | 3.24      | A:SER 101[ N ]    | 7                     | C:ARG 794[ NH2 ] | 2.94      | A:LEU 102[ O ]    | 7                     | C:ARG 794[ NH2 ] | 2.94      | A:LEU 102[ O ]    | 7                           | C:TYR 793[ OH ]  | 2.41      | A:LYS 27[ NZ ]    |
| 8                     | C:GLU 787[ OE1 ] | 2.81      | A:LEU 102[ N ]    | 8                     | C:TYR 789[ OH ]  | 3.61      | A:GLN 114[ OE2 ]  | 8                     | C:LYS 796[ NZ ]  | 3.06      | A:GLU 9[ OE2 ]    | 8                     | C:LYS 796[ NZ ]  | 3.06      | A:GLU 9[ OE2 ]    |                             |                  |           |                   |
| 9                     | C:GLU 787[ OE1 ] | 2.96      | A:LEU 103[ N ]    | 9                     | C:TYR 790[ OH ]  | 3.33      | A:HIS 110[ ND1 ]  | 9                     | C:PRO 781[ O ]   | 3.47      | A:SER 37[ OG ]    | 9                     | C:PRO 781[ O ]   | 3.47      | A:SER 37[ OG ]    |                             |                  |           |                   |
| 10                    | C:GLU 787[ OE1 ] | 2.62      | A:LEU 103[ N ]    |                       |                  |           |                   | 10                    | C:GLU 787[ OE1 ] | 2.77      | A:LEU 102[ N ]    | 10                    | C:GLU 787[ OE1 ] | 2.77      | A:LEU 102[ N ]    |                             |                  |           |                   |
|                       |                  |           |                   |                       |                  |           |                   | 11                    | C:GLU 787[ OE1 ] | 3.68      | A:LEU 103[ N ]    | 11                    | C:GLU 787[ OE1 ] | 3.68      | A:LEU 103[ N ]    |                             |                  |           |                   |
|                       |                  |           |                   |                       |                  |           |                   | 12                    | C:GLU 787[ OE1 ] | 2.97      | A:GLU 101[ N ]    | 12                    | C:GLU 787[ OE1 ] | 2.97      | A:GLU 101[ N ]    |                             |                  |           |                   |
|                       |                  |           |                   |                       |                  |           |                   | 13                    | C:TYR 789[ OH ]  | 3.58      | A:ARG 6[ NH2 ]    | 13                    | C:TYR 789[ OH ]  | 3.58      | A:ARG 6[ NH2 ]    |                             |                  |           |                   |

| MLC1/TgMyoA           |                  |           |                   | MLC1/TgMyoA           |                  |           |                   | MLC1/TgMyoA           |                  |           |                   | MLC1/TgMyoA           |                  |           |                   | MTIP/PfMyoA           |                  |           |                   |
|-----------------------|------------------|-----------|-------------------|-----------------------|------------------|-----------|-------------------|-----------------------|------------------|-----------|-------------------|-----------------------|------------------|-----------|-------------------|-----------------------|------------------|-----------|-------------------|
| MLC1/TgMyoA           | Interface:       | 1293.3    | (Å <sup>2</sup> ) | MLC1/TgMyoA           | Interface:       | 1305.2    | (Å <sup>2</sup> ) | MLC1/TgMyoA           | Interface:       | 1311.2    | (Å <sup>2</sup> ) | MLC1/TgMyoA           | Interface:       | 1311.2    | (Å <sup>2</sup> ) | MLC1/TgMyoA           | Interface:       | 1378.5    | (Å <sup>2</sup> ) |
| <b>Salt bridges</b>   |                  |           |                   | <b>Salt bridges</b>   |                  |           |                   | <b>Salt bridges</b>   |                  |           |                   | <b>Salt bridges</b>   |                  |           |                   | <b>Salt bridges</b>   |                  |           |                   |
| ##                    | TgMyoA           | Dist. [Å] | MLC1              | ##                    | TgMyoA           | Dist. [Å] | MLC1              | ##                    | TgMyoA           | Dist. [Å] | MLC1              | ##                    | TgMyoA           | Dist. [Å] | MLC1              | ##                    | PfMyoA           | Dist. [Å] | MTIP              |
| 1                     | C:LYS 802[ NZ ]  | 3.94      | B:GLU 152[ OE1 ]  | 1                     | C:ARG 808[ NE ]  | 3.46      | B:ASP 145[ OD2 ]  | 1                     | C:LYS 802[ NZ ]  | 2.70      | B:GLU 152[ OE1 ]  | 1                     | C:ARG 808[ NE ]  | 3.52      | A:ASP 145[ OD2 ]  | 1                     | C:ARG 806[ NE ]  | 3.45      | B:ASP 139[ OD1 ]  |
| 2                     | C:ARG 808[ NE ]  | 2.70      | B:ASP 145[ OD1 ]  | 2                     | C:ARG 808[ NE ]  | 2.98      | B:ASP 145[ OD1 ]  | 2                     | C:LYS 802[ NZ ]  | 3.68      | B:GLU 152[ OE2 ]  | 2                     | C:ARG 808[ NE ]  | 2.89      | A:ASP 145[ OD1 ]  | 2                     | C:ARG 806[ NE ]  | 2.84      | B:ASP 139[ OD2 ]  |
| 3                     | C:ARG 808[ NE ]  | 3.41      | B:ASP 145[ OD2 ]  | 3                     | C:ARG 808[ NH2 ] | 2.92      | B:ASP 145[ OD2 ]  | 3                     | C:ARG 808[ NE ]  | 3.56      | B:ASP 145[ OD2 ]  | 3                     | C:ARG 808[ NH1 ] | 2.96      | A:ASP 145[ OD2 ]  | 3                     | C:ARG 806[ NH1 ] | 3.86      | B:ASP 110[ OD2 ]  |
| 4                     | C:ARG 808[ NH2 ] | 3.59      | B:ASP 145[ OD1 ]  | 4                     | C:ARG 808[ NH2 ] | 3.83      | B:ASP 145[ OD1 ]  | 4                     | C:ARG 808[ NE ]  | 2.86      | B:ASP 145[ OD1 ]  | 4                     | C:ARG 808[ NH1 ] | 3.79      | A:ASP 145[ OD1 ]  | 4                     | C:ARG 806[ NH2 ] | 2.91      | B:ASP 139[ OD2 ]  |
| 5                     | C:ARG 808[ NH2 ] | 2.72      | B:ASP 145[ OD2 ]  | 5                     | C:HIS 812[ NE2 ] | 2.75      | B:ASP 145[ OD2 ]  | 5                     | C:ARG 808[ NH2 ] | 2.87      | B:ASP 145[ OD2 ]  | 5                     | C:HIS 812[ NE2 ] | 2.61      | A:ASP 145[ OD2 ]  | 5                     | C:HIS 810[ NE2 ] | 3.05      | B:ASP 139[ OD2 ]  |
| 6                     | C:HIS 812[ ND1 ] | 3.56      | B:GLU 212[ OE1 ]  | 6                     | C:ARG 814[ NE ]  | 3.50      | B:GLU 185[ OE1 ]  | 6                     | C:ARG 808[ NH2 ] | 3.72      | B:ASP 145[ OD1 ]  | 6                     | C:ARG 814[ NE ]  | 3.51      | A:GLU 185[ OE1 ]  | 6                     | C:ARG 812[ NH1 ] | 3.11      | B:GLU 179[ OE1 ]  |
| 7                     | C:HIS 812[ NE2 ] | 2.59      | B:ASP 145[ OD2 ]  | 7                     | C:ARG 814[ NE ]  | 2.88      | B:GLU 185[ OE2 ]  | 7                     | C:HIS 812[ ND1 ] | 3.33      | B:GLU 212[ OE1 ]  | 7                     | C:ARG 814[ NE ]  | 2.87      | A:GLU 185[ OE2 ]  | 7                     | C:ARG 812[ NH1 ] | 3.53      | B:GLU 179[ OE2 ]  |
| 8                     | C:ARG 814[ NE ]  | 3.24      | B:GLU 185[ OE1 ]  | 8                     | C:ARG 814[ NH2 ] | 3.02      | B:GLU 185[ OE1 ]  | 8                     | C:HIS 812[ NE2 ] | 2.90      | B:ASP 145[ OD2 ]  | 8                     | C:ARG 814[ NH2 ] | 2.85      | A:GLU 185[ OE1 ]  | 8                     | C:LYS 814[ NZ ]  | 2.92      | B:ASP 201[ OD2 ]  |
| 9                     | C:ARG 814[ NE ]  | 2.82      | B:GLU 185[ OE2 ]  | 9                     | C:ARG 814[ NH2 ] | 3.80      | B:GLU 185[ OE2 ]  | 9                     | C:ARG 814[ NE ]  | 2.63      | B:GLU 185[ OE2 ]  | 9                     | C:ARG 814[ NH2 ] | 2.85      | A:GLU 185[ OE1 ]  |                       |                  |           |                   |
| 10                    | C:ARG 814[ NH2 ] | 2.72      | B:GLU 185[ OE1 ]  | 10                    | C:HIS 816[ NE2 ] | 3.04      | B:GLU 192[ OE1 ]  | 10                    | C:ARG 814[ NE ]  | 3.60      | B:GLU 185[ OE1 ]  | 10                    | C:ARG 814[ NH2 ] | 3.73      | A:GLU 185[ OE2 ]  |                       |                  |           |                   |
| 11                    | C:ARG 814[ NH2 ] | 3.76      | B:GLU 185[ OE2 ]  | 11                    | C:HIS 816[ NE2 ] | 3.21      | B:GLU 192[ OE2 ]  | 11                    | C:ARG 814[ NH2 ] | 3.59      | B:GLU 185[ OE2 ]  | 11                    | C:ARG 814[ NH2 ] | 3.73      | A:GLU 185[ OE2 ]  |                       |                  |           |                   |
| 12                    | C:ARG 815[ NE ]  | 3.03      | B:GLU 212[ OE1 ]  |                       |                  |           |                   | 12                    | C:ARG 814[ NH2 ] | 3.05      | B:GLU 185[ OE1 ]  | 12                    | C:ARG 814[ NH2 ] | 2.85      | B:GLU 185[ OE1 ]  |                       |                  |           |                   |
| 13                    | C:ARG 815[ NH2 ] | 3.90      | B:GLU 212[ OE1 ]  |                       |                  |           |                   | 13                    | C:ARG 815[ NE ]  | 2.95      | B:GLU 212[ OE1 ]  | 13                    | C:ARG 814[ NH2 ] | 2.85      | B:GLU 185[ OE1 ]  |                       |                  |           |                   |
|                       |                  |           |                   |                       |                  |           |                   | 14                    | C:ARG 815[ NH2 ] | 3.71      | B:GLU 212[ OE1 ]  | 14                    | C:ARG 814[ NH2 ] | 2.85      | B:GLU 185[ OE1 ]  |                       |                  |           |                   |
| <b>Hydrogen bonds</b> |                  |           |                   | <b>Hydrogen bonds</b> |                  |           |                   | <b>Hydrogen bonds</b> |                  |           |                   | <b>Hydrogen bonds</b> |                  |           |                   | <b>Hydrogen bonds</b> |                  |           |                   |
| 1                     | C:ARG 808[ NE ]  | 2.70      | B:ASP 145[ OD1 ]  | 1                     | C:ARG 808[ NE ]  | 2.98      | B:ASP 145[ OD1 ]  | 1                     | C:LYS 802[ NZ ]  | 2.70      | B:GLU 152[ OE1 ]  | 1                     | C:ARG 808[ NE ]  | 2.89      | A:ASP 145[ OD1 ]  | 1                     | C:SER 803[ OG ]  | 3.07      | B:LEU 144[ O ]    |
| 2                     | C:ARG 808[ NH1 ] | 2.99      | B:ALA 111[ O ]    | 2                     | C:ARG 808[ NH1 ] | 2.95      | B:ALA 111[ O ]    | 2                     | C:ARG 808[ NE ]  | 2.86      | B:ASP 145[ OD1 ]  | 2                     | C:ARG 808[ NH1 ] | 2.96      | A:ASP 145[ OD2 ]  | 2                     | C:ARG 806[ NE ]  | 2.84      | B:ASP 139[ OD2 ]  |
| 3                     | C:ARG 808[ NH2 ] | 2.72      | B:ASP 145[ OD2 ]  | 3                     | C:ARG 808[ NH2 ] | 2.92      | B:ASP 145[ OD2 ]  | 3                     | C:ARG 808[ NH1 ] | 2.87      | B:ALA 111[ O ]    | 3                     | C:ARG 808[ NH2 ] | 2.79      | A:ALA 111[ O ]    | 3                     | C:ARG 806[ NH1 ] | 3.13      | B:ALA 105[ O ]    |
| 4                     | C:ARG 808[ NH2 ] | 2.93      | B:ALA 111[ O ]    | 4                     | C:ARG 808[ NH2 ] | 2.86      | B:ALA 111[ O ]    | 4                     | C:ARG 808[ NH2 ] | 2.87      | B:ALA 111[ O ]    | 4                     | C:ARG 808[ NH2 ] | 2.87      | A:ALA 111[ O ]    | 4                     | C:ARG 806[ NH1 ] | 3.86      | B:ASP 110[ OD2 ]  |
| 5                     | C:GLN 810[ NE2 ] | 2.92      | B:TYR 177[ O ]    | 5                     | C:GLN 810[ NE2 ] | 2.88      | B:LEU 174[ O ]    | 5                     | C:ARG 808[ NH2 ] | 2.97      | B:ALA 111[ O ]    | 5                     | C:GLN 810[ NE2 ] | 2.82      | A:TYR 177[ O ]    | 5                     | C:ARG 806[ NH2 ] | 2.91      | B:ASP 139[ OD2 ]  |
| 6                     | C:GLN 810[ NE2 ] | 2.90      | B:LEU 174[ O ]    | 6                     | C:ARG 814[ NE ]  | 2.88      | B:GLU 185[ OE2 ]  | 6                     | C:ARG 808[ NH2 ] | 2.87      | B:ALA 111[ O ]    | 6                     | C:GLN 810[ NE2 ] | 2.96      | A:LEU 174[ O ]    | 6                     | C:ARG 806[ NH2 ] | 2.85      | B:ALA 105[ O ]    |
| 7                     | C:HIS 812[ NE2 ] | 2.59      | B:ASP 145[ OD2 ]  | 7                     | C:HIS 812[ NE2 ] | 2.75      | B:ASP 145[ OD2 ]  | 7                     | C:ARG 814[ NE ]  | 3.01      | B:GLU 179[ O ]    | 7                     | C:HIS 812[ ND1 ] | 3.48      | A:MET 208[ O ]    | 7                     | C:GLN 808[ NE2 ] | 2.68      | B:TRP 171[ O ]    |
| 8                     | C:ARG 814[ NE ]  | 2.82      | B:GLU 185[ OE2 ]  | 8                     | C:ARG 814[ NH2 ] | 2.88      | B:GLU 185[ OE2 ]  | 8                     | C:ARG 814[ NH1 ] | 3.01      | B:GLU 179[ O ]    | 8                     | C:HIS 812[ NE2 ] | 2.61      | A:ASP 145[ OD2 ]  | 8                     | C:GLN 810[ NE2 ] | 3.06      | B:LEU 168[ O ]    |
| 9                     | C:ARG 814[ NE ]  | 3.69      | B:TYR 114[ OH ]   | 9                     | C:ARG 814[ NH2 ] | 3.02      | B:GLU 185[ OE1 ]  | 9                     | C:ARG 814[ NH2 ] | 3.02      | B:GLU 185[ OE1 ]  | 9                     | C:ARG 814[ NE ]  | 2.87      | A:GLU 185[ OE2 ]  | 9                     | C:ARG 812[ NH1 ] | 3.11      | B:GLU 179[ OE1 ]  |
| 10                    | C:ARG 814[ NH1 ] | 3.01      | B:GLU 179[ O ]    | 10                    | C:ARG 814[ NH2 ] | 3.02      | B:GLU 185[ OE1 ]  | 10                    | C:ARG 814[ NE ]  | 2.63      | B:GLU 185[ OE2 ]  | 10                    | C:ARG 814[ NH2 ] | 2.85      | A:PRO 180[ O ]    | 10                    | C:ARG 812[ NH2 ] | 2.62      | B:ASP 173[ O ]    |
| 11                    | C:ARG 814[ NH2 ] | 3.08      | B:PRO 180[ O ]    | 11                    | C:ARG 814[ NH2 ] | 3.11      | B:GLU 179[ O ]    | 11                    | C:ARG 814[ NH2 ] | 3.59      | B:GLU 185[ OE2 ]  | 11                    | C:ARG 814[ NH2 ] | 2.85      | A:PRO 180[ O ]    | 11                    | C:ARG 812[ NH2 ] | 3.42      | B:ALA 174[ O ]    |
| 12                    | C:ARG 814[ NH2 ] | 2.72      | B:GLU 185[ OE1 ]  | 12                    | C:ARG 814[ NH2 ] | 2.75      | B:PRO 180[ O ]    | 12                    | C:ARG 814[ NH2 ] | 3.05      | B:GLU 185[ OE1 ]  | 12                    | C:ARG 814[ NH2 ] | 2.85      | A:GLU 185[ OE1 ]  | 12                    | C:LYS 813[ NZ ]  | 3.36      | B:LEU 203[ O ]    |
| 13                    | C:ARG 815[ NE ]  | 3.03      | B:GLU 212[ OE1 ]  | 13                    | C:ARG 815[ NH1 ] | 3.70      |                   |                       |                  |           |                   |                       |                  |           |                   |                       |                  |           |                   |
